# Supplementary material for: Identification of Specific Cell Subpopulations and Marker Genes in Ovarian Cancer Using Single-Cell RNA Sequencing
Source: PubMed Central journal article supplement (PMC8517627; doi:10.1155/2021/1005793), 2021-10-07
Supplement: 1005793.f1.pdf [file 1005793.f1.pdf]

Supplementary table 1. The IDs of TCGA ovarian cancer samples.

| Group | Sample |
|-------|--------|
| 0     | X1.C01 |
| 0     | X1.C15 |
| 0     | X1.C19 |
| 0     | X1.C22 |
| 0     | X1.C31 |
| 0     | X1.C34 |
| 0     | X1.C37 |
| 0     | X1.C38 |
| 0     | X1.C40 |
| 0     | X1.C81 |
| 0     | X2.C05 |
| 0     | X2.C14 |
| 0     | X2.C16 |
| 0     | X2.C21 |
| 0     | X2.C25 |
| 0     | X2.C29 |
| 0     | X2.C34 |
| 0     | X2.C49 |
| 0     | X2.C57 |
| 0     | X2.C69 |
| 0     | X2.C73 |
| 0     | X2.C79 |
| 0     | X2.C87 |
| 0     | X2.C95 |
| 1     | X1.C03 |
| 1     | X1.C08 |
| 1     | X1.C17 |
| 1     | X1.C18 |
| 1     | X1.C23 |
| 1     | X1.C27 |
| 1     | X1.C29 |
| 1     | X1.C51 |
| 1     | X1.C61 |
| 1     | X1.C75 |
| 1     | X2.C06 |
| 1     | X2.C18 |
| 1     | X2.C19 |
| 1     | X2.C23 |
| 1     | X2.C42 |
| 1     | X2.C51 |
| 1     | X2.C55 |
| 1     | X2.C70 |
| 1     | X2.C72 |
| 1     | X2.C74 |
| 1     | X2.C75 |
| 1     | X2.C86 |
| 2     | X1.C02 |
| 2     | X1.C30 |
| 2     | X1.C41 |
| 2     | X1.C42 |
| 2     | X1.C49 |

|   |        |
|---|--------|
| 2 | X1.C65 |
| 2 | X1.C67 |
| 2 | X2.C03 |
| 2 | X2.C07 |
| 2 | X2.C10 |
| 2 | X2.C15 |
| 2 | X2.C22 |
| 2 | X2.C27 |
| 2 | X2.C53 |
| 2 | X2.C56 |
| 2 | X2.C59 |
| 2 | X2.C63 |
| 2 | X2.C64 |
| 2 | X2.C67 |
| 2 | X2.C71 |
