# Supplementary material for: Identification of Specific Cell Subpopulations and Marker Genes in Ovarian Cancer Using Single-Cell RNA Sequencing
Source: PubMed Central journal article supplement (PMC8517627; doi:10.1155/2021/1005793), 2021-10-07
Supplement: 1005793.f2.pdf [file 1005793.f2.pdf]

Supplementary table 2. The list of which cells were in which cluster.

TCGA-61-1910-01  
TCGA-61-1728-01  
TCGA-13-1819-02  
TCGA-31-1953-01  
TCGA-13-1819-01  
TCGA-13-0764-01  
TCGA-31-1951-01  
TCGA-24-1552-01  
TCGA-13-1477-01  
TCGA-30-1862-01  
TCGA-29-1698-01  
TCGA-13-0924-01  
TCGA-25-1326-01  
TCGA-09-1659-01  
TCGA-23-1021-01  
TCGA-04-1525-01  
TCGA-23-2084-01  
TCGA-24-2281-01  
TCGA-61-1918-01  
TCGA-24-0982-01  
TCGA-04-1516-01  
TCGA-23-1122-01  
TCGA-23-1109-01  
TCGA-01-0628-11  
TCGA-24-1924-01  
TCGA-09-1666-01  
TCGA-61-1724-01  
TCGA-24-1426-01  
TCGA-23-1116-01  
TCGA-25-2398-01  
TCGA-25-2409-01  
TCGA-29-1778-01  
TCGA-13-0791-02  
TCGA-04-1343-01  
TCGA-13-0791-01  
TCGA-13-1506-01  
TCGA-04-1360-01  
TCGA-01-0639-11  
TCGA-42-2582-01  
TCGA-13-1496-01  
TCGA-25-1626-01  
TCGA-20-0987-01  
TCGA-09-1662-01  
TCGA-24-2024-01  
TCGA-01-0630-11  
TCGA-09-1675-01  
TCGA-04-1644-01  
TCGA-10-0931-01  
TCGA-25-1623-01  
TCGA-29-1774-01  
TCGA-61-2016-01  
TCGA-13-0795-01

TCGA-61-2113-01  
TCGA-13-1492-01  
TCGA-24-2260-01  
TCGA-13-1485-01  
TCGA-13-2057-01  
TCGA-36-2552-01  
TCGA-23-1024-01  
TCGA-09-0365-01  
TCGA-13-0885-01  
TCGA-29-1688-01  
TCGA-24-1928-01  
TCGA-25-1315-01  
TCGA-13-0804-01  
TCGA-25-1877-01  
TCGA-36-2542-01  
TCGA-24-2297-01  
TCGA-61-2111-01  
TCGA-23-1119-01  
TCGA-20-1687-01  
TCGA-13-1489-02  
TCGA-13-1489-01  
TCGA-29-1694-01  
TCGA-30-1892-01  
TCGA-25-1319-01  
TCGA-04-1349-01  
TCGA-24-1564-01  
TCGA-61-1722-01  
TCGA-20-1683-01  
TCGA-24-2038-01  
TCGA-23-1031-01  
TCGA-13-0755-01  
TCGA-04-1652-01  
TCGA-36-1575-01  
TCGA-36-1568-01  
TCGA-31-1959-01  
TCGA-57-1993-01  
TCGA-23-2081-01  
TCGA-09-0369-01  
TCGA-09-2053-01  
TCGA-24-1556-01  
TCGA-25-1323-01  
TCGA-13-1512-01  
TCGA-09-0364-01  
TCGA-13-0802-01  
TCGA-29-1761-01  
TCGA-61-1738-01  
TCGA-25-2400-01  
TCGA-29-2434-01  
TCGA-13-0751-01  
TCGA-29-2436-01  
TCGA-61-1899-01  
TCGA-13-1404-01  
TCGA-57-1585-01

TCGA-59-2351-01  
TCGA-04-1335-01  
TCGA-13-0894-01  
TCGA-04-1356-01  
TCGA-61-1734-01  
TCGA-24-1423-01  
TCGA-13-0766-01  
TCGA-25-1632-01  
TCGA-29-1770-01  
TCGA-13-1408-01  
TCGA-29-1770-02  
TCGA-61-1730-01  
TCGA-29-1691-01  
TCGA-61-2101-01  
TCGA-24-1845-01  
TCGA-04-1365-01  
TCGA-59-2355-01  
TCGA-25-1634-01  
TCGA-30-1860-01  
TCGA-10-0927-01  
TCGA-13-0890-01  
TCGA-24-1544-01  
TCGA-24-1849-01  
TCGA-13-1410-01  
TCGA-36-1571-01  
TCGA-13-0920-01  
TCGA-13-0714-01  
TCGA-24-2293-01  
TCGA-13-2071-01  
TCGA-24-0968-01  
TCGA-04-1530-01  
TCGA-24-1553-01  
TCGA-13-2065-01  
TCGA-24-1603-01  
TCGA-36-1581-01  
TCGA-61-2613-01  
TCGA-13-0727-01  
TCGA-23-1123-01  
TCGA-04-1369-01  
TCGA-61-2000-01  
TCGA-23-1111-01  
TCGA-04-1337-01  
TCGA-30-1859-01  
TCGA-61-2002-01  
TCGA-25-2404-01  
TCGA-29-1702-01  
TCGA-29-1710-02  
TCGA-24-1466-01  
TCGA-36-2539-01  
TCGA-04-1348-01  
TCGA-13-0919-01  
TCGA-61-2009-01  
TCGA-10-0933-01

TCGA-61-1995-01  
TCGA-24-1427-01  
TCGA-24-1847-01  
TCGA-09-1670-01  
TCGA-30-1855-01  
TCGA-04-1648-01  
TCGA-09-2056-01  
TCGA-04-1361-01  
TCGA-13-0794-01  
TCGA-24-1551-01  
TCGA-13-0765-01  
TCGA-09-2044-01  
TCGA-24-2035-01  
TCGA-09-1674-01  
TCGA-13-0884-01  
TCGA-13-1497-01  
TCGA-01-0631-11  
TCGA-20-1685-01  
TCGA-10-0936-01  
TCGA-13-0913-02  
TCGA-13-0913-01  
TCGA-24-1923-01  
TCGA-13-1484-01  
TCGA-23-1114-01  
TCGA-24-1471-01  
TCGA-61-2097-01  
TCGA-13-2059-01  
TCGA-42-2588-01  
TCGA-61-2088-01  
TCGA-04-1367-01  
TCGA-25-2042-01  
TCGA-24-1920-01  
TCGA-61-1916-02  
TCGA-61-1916-01  
TCGA-61-2096-01  
TCGA-09-1667-01  
TCGA-36-1569-01  
TCGA-24-2029-01  
TCGA-36-2548-01  
TCGA-29-2431-01  
TCGA-09-1669-01  
TCGA-29-1776-01  
TCGA-04-1341-01  
TCGA-25-1871-01  
TCGA-13-0923-01  
TCGA-24-2020-01  
TCGA-04-1353-01  
TCGA-04-1655-01  
TCGA-25-1313-01  
TCGA-23-2643-01  
TCGA-13-0720-01  
TCGA-04-1357-01  
TCGA-13-0899-01

TCGA-13-0768-01  
TCGA-59-2350-01  
TCGA-29-2428-01  
TCGA-24-1557-01  
TCGA-24-1435-01  
TCGA-36-2540-01  
TCGA-13-0889-01  
TCGA-59-2354-01  
TCGA-13-0803-01  
TCGA-01-0642-11  
TCGA-24-1413-01  
TCGA-61-2109-01  
TCGA-04-1514-01  
TCGA-29-1690-01  
TCGA-04-1338-01  
TCGA-24-1555-01  
TCGA-61-2098-01  
TCGA-29-1769-01  
TCGA-36-2544-01  
TCGA-25-1325-01  
TCGA-24-1567-01  
TCGA-24-2023-01  
TCGA-57-1583-01  
TCGA-24-1474-01  
TCGA-36-2530-01  
TCGA-23-1032-01  
TCGA-57-1584-01  
TCGA-42-2590-01  
TCGA-13-0906-01  
TCGA-61-1903-01  
TCGA-59-2352-01  
TCGA-24-1563-01  
TCGA-61-2612-01  
TCGA-24-0979-01  
TCGA-13-1500-01  
TCGA-36-2534-01  
TCGA-25-1625-01  
TCGA-24-1467-01  
TCGA-04-1332-01  
TCGA-13-0792-01  
TCGA-13-1510-01  
TCGA-24-0970-01  
TCGA-25-1320-01  
TCGA-13-1501-01  
TCGA-09-0367-01  
TCGA-24-0975-01  
TCGA-13-0908-01  
TCGA-59-2349-01  
TCGA-25-1317-01  
TCGA-25-1635-01  
TCGA-13-0762-01  
TCGA-23-1028-01  
TCGA-25-2408-01

TCGA-25-1329-01  
TCGA-61-2008-01  
TCGA-61-2008-02  
TCGA-24-1546-01  
TCGA-25-1630-01  
TCGA-04-1649-01  
TCGA-61-1913-01  
TCGA-20-0991-01  
TCGA-13-1505-01  
TCGA-09-2048-01  
TCGA-36-1574-01  
TCGA-30-1861-01  
TCGA-30-1856-01  
TCGA-24-1417-01  
TCGA-61-2610-02  
TCGA-24-1614-01  
TCGA-13-1495-01  
TCGA-59-2372-01  
TCGA-13-0904-01  
TCGA-23-1121-01  
TCGA-36-2529-01  
TCGA-23-1023-01  
TCGA-13-2061-01  
TCGA-36-2551-01  
TCGA-30-1891-01  
TCGA-29-2414-01  
TCGA-29-2414-02  
TCGA-13-0912-01  
TCGA-24-1843-01  
TCGA-24-1470-01  
TCGA-36-1580-01  
TCGA-13-0916-01  
TCGA-42-2589-01  
TCGA-20-1684-01  
TCGA-13-1488-01  
TCGA-09-2050-01  
TCGA-30-1880-01  
TCGA-30-1867-01  
TCGA-61-1901-01  
TCGA-29-1710-01  
TCGA-13-0901-01  
TCGA-61-2018-01  
TCGA-57-1992-01  
TCGA-04-1351-01  
TCGA-61-1736-01  
TCGA-10-0937-01  
TCGA-09-1665-01  
TCGA-36-2538-01  
TCGA-24-1852-01  
TCGA-23-2641-01  
TCGA-61-1740-01  
TCGA-61-1900-01  
TCGA-13-1499-01

TCGA-29-1781-01  
TCGA-61-1915-01  
TCGA-29-1704-01  
TCGA-24-1616-01  
TCGA-61-1727-01  
TCGA-29-2427-01  
TCGA-25-1870-01  
TCGA-29-2425-01  
TCGA-09-1672-01  
TCGA-24-1550-01  
TCGA-13-0886-01  
TCGA-29-1763-01  
TCGA-24-2288-01  
TCGA-25-1312-01  
TCGA-09-2055-01  
TCGA-10-0926-01  
TCGA-13-0807-01  
TCGA-13-1482-01  
TCGA-31-1956-01  
TCGA-13-0730-01  
TCGA-04-1519-01  
TCGA-61-1737-01  
TCGA-23-2645-01  
TCGA-61-2104-01  
TCGA-13-0801-01  
TCGA-23-2647-01  
TCGA-13-0888-01  
TCGA-24-2033-01  
TCGA-10-0934-01  
TCGA-29-1764-01  
TCGA-29-1696-01  
TCGA-04-1654-01  
TCGA-04-1536-01  
TCGA-61-2095-02  
TCGA-23-1027-01  
TCGA-04-1651-01  
TCGA-61-1906-01  
TCGA-04-1346-01  
TCGA-57-1994-01  
TCGA-25-2399-01  
TCGA-24-1548-01  
TCGA-36-2545-01  
TCGA-36-1577-01  
TCGA-24-1562-01  
TCGA-24-1463-01  
TCGA-61-1725-01  
TCGA-13-1403-01  
TCGA-24-1431-01  
TCGA-36-1578-01  
TCGA-24-2262-01  
TCGA-04-1342-01  
TCGA-04-1336-01  
TCGA-36-2549-01

TCGA-29-1784-01  
TCGA-42-2591-01  
TCGA-29-1777-01  
TCGA-09-1661-01  
TCGA-29-2429-01  
TCGA-23-2072-01  
TCGA-24-1565-01  
TCGA-24-0980-01  
TCGA-13-0903-01  
TCGA-13-1511-01  
TCGA-24-1425-01  
TCGA-25-2392-01  
TCGA-29-1701-01  
TCGA-24-1846-01  
TCGA-24-2027-01  
TCGA-09-0366-01  
TCGA-24-1850-01  
TCGA-09-2045-01  
TCGA-24-1852-02  
TCGA-25-1316-01  
TCGA-61-1733-01  
TCGA-20-0990-01  
TCGA-59-2348-01  
TCGA-23-1118-01  
TCGA-13-0726-01  
TCGA-13-0793-01  
TCGA-61-2095-01  
TCGA-13-0897-01  
TCGA-24-1103-01  
TCGA-13-1817-02  
TCGA-13-1498-01  
TCGA-24-2298-01  
TCGA-25-1328-01  
TCGA-25-1631-01  
TCGA-13-0725-01  
TCGA-24-2019-01  
TCGA-13-0893-01  
TCGA-57-1582-01  
TCGA-09-2049-01  
TCGA-13-0910-01  
TCGA-31-1946-01  
TCGA-23-1124-01  
TCGA-25-1321-01  
TCGA-29-1692-02  
TCGA-29-1768-01  
TCGA-29-1692-01  
TCGA-30-1857-01  
TCGA-13-0900-01  
TCGA-24-1416-01  
TCGA-25-1324-01  
TCGA-04-1364-01  
TCGA-23-1107-01  
TCGA-01-0636-11



TCGA-61-2092-01  
TCGA-24-1422-01  
TCGA-23-1022-01  
TCGA-24-1428-01  
TCGA-36-2532-01  
TCGA-13-2060-01  
TCGA-61-2614-01  
TCGA-24-2254-01  
TCGA-23-1120-01  
TCGA-23-1113-01  
TCGA-42-2587-01  
TCGA-13-1504-01  
TCGA-24-2290-01  
TCGA-09-1668-01  
TCGA-29-1783-01  
TCGA-13-1407-01  
TCGA-24-1424-01  
TCGA-13-1507-01  
TCGA-24-1105-01  
TCGA-13-0724-01  
TCGA-24-1469-01  
TCGA-61-1917-01  
TCGA-36-1570-01  
TCGA-25-1322-01  
TCGA-23-2079-01  
TCGA-09-1664-01  
TCGA-01-0637-11  
TCGA-13-0758-01  
TCGA-13-0883-01  
TCGA-13-1412-01  
TCGA-61-1741-01  
TCGA-04-1646-01  
TCGA-24-1434-01  
TCGA-25-1633-01  
TCGA-25-2396-01  
TCGA-61-1914-01  
TCGA-29-1705-01  
TCGA-24-2036-01  
TCGA-29-1705-02  
TCGA-13-0797-01  
TCGA-13-2066-01  
TCGA-04-1362-01  
TCGA-13-1509-01  
TCGA-13-1494-01  
TCGA-04-1350-01  
TCGA-09-1673-01  
TCGA-25-1627-01  
TCGA-29-1785-01  
TCGA-61-2087-01  
TCGA-61-1911-01  
TCGA-61-2012-01  
TCGA-13-0717-01  
TCGA-29-1699-01

TCGA-24-1930-01  
TCGA-13-0887-01  
TCGA-31-1950-01  
TCGA-57-1586-01  
TCGA-24-2271-01  
TCGA-13-1491-01  
TCGA-24-2267-01  
TCGA-04-1517-01  
TCGA-61-1904-01  
TCGA-13-1483-01  
TCGA-10-0938-01  
TCGA-30-1718-01  
TCGA-13-0921-01  
TCGA-24-2280-01  
TCGA-13-0799-01  
TCGA-13-1487-01  
TCGA-24-1604-01  
TCGA-29-1695-01  
TCGA-29-1697-01  
TCGA-25-1318-01  
TCGA-36-1576-01  
TCGA-13-1411-01  
TCGA-30-1887-01  
TCGA-30-1714-01  
TCGA-23-1026-01  
TCGA-13-0757-01  
TCGA-09-2054-01  
TCGA-61-1919-01  
TCGA-61-2017-01  
TCGA-24-1558-01  
TCGA-23-1117-01  
TCGA-09-2051-01  
TCGA-29-1711-01  
TCGA-23-1809-01  
TCGA-24-1418-01  
TCGA-23-2077-01  
TCGA-24-1430-01  
TCGA-61-1895-01  
TCGA-04-1347-01  
TCGA-20-0996-01  
TCGA-10-0930-01  
TCGA-13-1817-01  
TCGA-29-1775-01  
TCGA-24-0966-01  
TCGA-61-2102-01  
TCGA-24-2261-01  
TCGA-61-2003-01  
TCGA-13-0800-01  
TCGA-25-2391-01  
TCGA-25-1314-01  
TCGA-25-2393-01  
TCGA-13-1409-01  
TCGA-29-1762-01

TCGA-24-2026-01  
TCGA-10-0928-01  
TCGA-13-0805-01  
TCGA-61-1998-01  
TCGA-23-1029-01  
TCGA-10-0925-01  
TCGA-61-1721-01  
TCGA-36-2543-01  
TCGA-61-2110-01  
TCGA-20-1686-01  
TCGA-24-1549-01  
TCGA-13-0761-01  
TCGA-29-1766-01  
TCGA-59-2363-01  
TCGA-25-1878-01  
TCGA-24-1419-01  
TCGA-24-1560-01  
TCGA-23-1030-01  
TCGA-25-2401-01  
TCGA-29-1693-01  
TCGA-61-2611-02  
TCGA-20-1682-01  
TCGA-24-2295-01  
TCGA-30-1866-01  
TCGA-10-0935-01  
TCGA-24-2030-01  
TCGA-29-2432-01  
TCGA-13-0905-01  
TCGA-04-1331-01  
TCGA-30-1853-01  
TCGA-13-0911-01  
TCGA-36-2533-01  
TCGA-23-1110-01  
TCGA-24-1842-01  
TCGA-13-1405-01  
TCGA-09-2043-01  
TCGA-24-1464-01  
TCGA-29-1703-01  
TCGA-36-2537-01  
TCGA-61-1743-01  
TCGA-42-2593-01  
TCGA-24-1104-01  
TCGA-23-2649-01  
TCGA-31-1944-01  
TCGA-29-1771-01  
TCGA-04-1542-01  
TCGA-61-2094-01  
TCGA-25-1628-01  
TCGA-04-1371-01  
TCGA-29-1707-02  
TCGA-29-1707-01  
TCGA-24-1844-01  
TCGA-24-1436-01

TCGA-23-2078-01  
TCGA-13-0891-01  
TCGA-24-2289-01  
TCGA-13-1481-01  
TCGA-25-2397-01  
TCGA-24-1545-01  
TCGA-61-1907-01  
TCGA-01-0633-11  
TCGA-04-1638-01  
TCGA-36-2547-01  
TCGA-13-0723-01
